# Supplementary material
Source: PubMed Central journal article supplement (PMC3093434)
Supplement: NIHMS270373-supplement-Supplementary_Tables.pdf [file NIHMS270373-supplement-Supplementary_Tables.pdf]

**Supplementary Table 1. Associations between F2-isoprostane levels and participant characteristics**

|                             | Median F2IP | IQR         | p value* | Adjusted Geometric Mean† | 95% CI      | p value* | p linear trend‡ |
|-----------------------------|-------------|-------------|----------|--------------------------|-------------|----------|-----------------|
| <u>Age</u>                  |             |             |          |                          |             |          |                 |
| 50-59                       | 1.71        | 1.20 - 2.40 | 0.432    | 1.69                     | 1.50 - 1.90 | <0.001   | 0.675           |
| 60-69                       | 1.77        | 1.31 - 2.44 |          | 1.82                     | 1.69 - 1.97 |          |                 |
| 70 and over                 | 1.72        | 1.21 - 2.42 |          | 1.72                     | 1.59 - 1.86 |          |                 |
| <u>Racial Group</u>         |             |             |          |                          |             |          |                 |
| African Amer                | 1.44        | 1.15 - 2.00 | 0.026    | 1.52                     | 1.30 - 1.78 | <0.001   |                 |
| Caucasian                   | 1.76        | 1.26 - 2.49 |          | 1.79                     | 1.69 - 1.88 |          |                 |
| <u>NSAID Use</u>            |             |             |          |                          |             |          |                 |
| No                          | 1.76        | 1.27 - 2.44 | 0.271    | 1.81                     | 1.69 - 1.94 | <0.001   |                 |
| Yes                         | 1.72        | 1.22 - 2.30 |          | 1.69                     | 1.57 - 1.82 |          |                 |
| <u>Smoker - ever</u>        |             |             |          |                          |             |          |                 |
| No                          | 1.67        | 1.15 - 2.39 | 0.152    | 1.78                     | 1.69 - 1.88 | 0.095    |                 |
| Yes                         | 1.78        | 1.27 - 2.42 |          | 1.73                     | 1.64 - 1.83 |          |                 |
| <u>Smoker - current</u>     |             |             |          |                          |             |          |                 |
| No                          | 1.72        | 1.23 - 2.42 | 0.251    | 1.75                     | 1.66 - 1.84 | 0.517    |                 |
| Yes                         | 1.97        | 1.43 - 2.35 |          | 1.73                     | 1.62 - 1.84 |          |                 |
| <u>BMI</u>                  |             |             |          |                          |             |          |                 |
| < 25                        | 2.08        | 1.36 - 2.89 | 0.003    | 1.94                     | 1.75 - 2.17 | <0.001   | 0.757           |
| > 25-30                     | 1.62        | 1.21 - 2.34 |          | 1.68                     | 1.58 - 1.79 |          |                 |
| >30                         | 1.77        | 1.31 - 2.29 |          | 1.79                     | 1.65 - 1.93 |          |                 |
| <u>Waist-Hip Ratio</u>      |             |             |          |                          |             |          |                 |
| 1st Quartile                | 1.75        | 1.25 - 2.43 | 0.794    | 1.75                     | 1.60 - 1.92 | 0.999    | 0.664           |
| 2nd Quartile                | 1.73        | 1.25 - 2.44 |          | 1.76                     | 1.63 - 1.90 |          |                 |
| 3rd Quartile                | 1.67        | 1.21 - 2.26 |          | 1.76                     | 1.65 - 1.89 |          |                 |
| 4th Quartile                | 1.78        | 1.26 - 2.43 |          | 1.75                     | 1.61- 1.91  |          |                 |
| <u>Family History</u>       |             |             |          |                          |             |          |                 |
| No                          | 1.76        | 1.25 - 2.43 | 0.619    | 1.76                     | 1.67 - 1.85 | 0.426    |                 |
| Yes                         | 1.62        | 1.22 - 2.34 |          | 1.74                     | 1.65 - 1.84 |          |                 |
| <u>Suspicious DRE</u>       |             |             |          |                          |             |          |                 |
| No                          | 1.76        | 1.23 - 2.43 | 0.400    | 1.77                     | 1.68 - 1.87 | <0.001   |                 |
| Yes                         | 1.55        | 1.33 - 2.02 |          | 1.46                     | 1.16 - 1.85 |          |                 |
| <u>PSA</u>                  |             |             |          |                          |             |          |                 |
| <= 4                        | 1.82        | 1.45 - 2.55 | 0.083    | 1.81                     | 1.64 - 1.99 | 0.001    | 0.871           |
| >4 to 10                    | 1.67        | 1.22 - 2.36 |          | 1.76                     | 1.67 - 1.86 |          |                 |
| >10                         | 1.82        | 1.21 - 2.57 |          | 1.68                     | 1.54 - 1.84 |          |                 |
| <u>TRUS Volume Quartile</u> |             |             |          |                          |             |          |                 |
| <=32cc                      | 1.90        | 1.23 - 2.64 | 0.536    | 1.88                     | 1.72 - 2.05 | <0.001   | 0.940           |
| >32 to <=43 cc              | 1.52        | 1.21 - 2.26 |          | 1.68                     | 1.55 - 1.82 |          |                 |
| >43 to <=61 cc              | 1.77        | 1.32 - 2.28 |          | 1.71                     | 1.60 - 1.83 |          |                 |
| >61 cc                      | 1.79        | 1.23 - 2.72 |          | 1.76                     | 1.60 - 1.93 |          |                 |

\* Kruskal-Wallis test and Wilcoxon rank-sum test.

Barocas DA, et al. Oxidative Stress Measured by Urine F2-Isoprostane Level Is Associated With Prostate Cancer

† Adjusted for diagnosis (benign, HGPIN, cancer), age, race, DRE result, WHR quartile, BMI, NSAID use, prostate volume quartile, PSA category.

‡ p-value for linear regression coefficient

F2IP = Urine F2-isoprostane level, normalized to creatinine; NSAID = non-steroidal anti-inflammatory drug; BMI = body-mass index; DRE = digital rectal exam; PSA = prostate-specific antigen; TRUS = trans-rectal ultrasound.

**Supplementary Table 2. Basic multinomial logistic regression predicting HGPIN or prostate cancer on biopsy, stratified by waist-to-hip ratio (WHR) and body-mass index (BMI)**

| F2IP Quartile                     | Number | HGPIN |             |         | Prostate Cancer |             |         |
|-----------------------------------|--------|-------|-------------|---------|-----------------|-------------|---------|
|                                   |        | OR    | 95% CI      | P value | OR              | 95% CI      | P value |
| <u>Basic Model</u>                |        |       |             |         |                 |             |         |
| Q1                                | 118    | 1     |             |         | 1               |             |         |
| Q2                                | 130    | 0.78  | 0.40 – 1.52 | 0.473   | 1.00            | 0.56 – 1.80 | 0.997   |
| Q3                                | 123    | 1.50  | 0.77 – 2.91 | 0.232   | 1.40            | 0.75 – 2.59 | 0.287   |
| Q4                                | 125    | 1.78  | 0.89 – 3.52 | 0.101   | 1.99            | 1.07 – 3.72 | 0.030   |
| p-trend                           |        |       |             | 0.030   |                 |             | 0.015   |
| <u>WHR at or below the median</u> |        |       |             |         |                 |             |         |
| Q1                                | 54     | 1     |             |         | 1               |             |         |
| Q2                                | 66     | 0.72  | 0.28 – 1.86 | 0.497   | 1.19            | 0.49 – 2.89 | 0.703   |
| Q3                                | 56     | 3.69  | 1.40 – 9.74 | 0.008   | 1.77            | 0.64 – 4.85 | 0.268   |
| Q4                                | 63     | 1.71  | 0.65 – 4.52 | 0.278   | 1.73            | 0.69 – 4.30 | 0.239   |
| p-trend                           |        |       |             | 0.025   |                 |             | 0.170   |
| <u>WHR above the median</u>       |        |       |             |         |                 |             |         |
| Q1                                | 63     | 1     |             |         | 1               |             |         |
| Q2                                | 64     | 0.90  | 0.34 – 2.36 | 0.827   | 1.02            | 0.44 – 2.36 | 0.957   |
| Q3                                | 67     | 0.49  | 0.18 – 1.37 | 0.173   | 1.15            | 0.51 – 2.61 | 0.741   |
| Q4                                | 62     | 2.36  | 0.82 – 6.77 | 0.110   | 2.77            | 1.07 – 7.19 | 0.036   |
| p-trend                           |        |       |             | 0.323   |                 |             | 0.054   |
| <u>BMI ≤ 25</u>                   |        |       |             |         |                 |             |         |
| Q1                                | 15     | 1     |             |         | 1               |             |         |
| Q2                                | 12     | 0.80  | 0.40 – 1.57 | 0.511   | 1.02            | 0.56 – 1.88 | 0.935   |
| Q3                                | 20     | 1.55  | 0.73 – 3.27 | 0.253   | 1.43            | 0.72 – 2.86 | 0.306   |
| Q4                                | 32     | 1.93  | 0.64 – 5.79 | 0.240   | 2.06            | 0.77 – 5.50 | 0.151   |
| p-trend                           |        |       |             | 0.093   |                 |             | 0.155   |
| <u>BMI &gt; 25 to 30</u>          |        |       |             |         |                 |             |         |
| Q1                                | 70     | 1     |             |         | 1               |             |         |
| Q2                                | 74     | 0.80  | 0.41 – 1.57 | 0.515   | 1.01            | 0.55 – 1.85 | 0.968   |
| Q3                                | 53     | 1.56  | 0.75 – 3.25 | 0.239   | 1.43            | 0.73 – 2.83 | 0.300   |
| Q4                                | 57     | 1.94  | 0.70 – 5.37 | 0.201   | 2.11            | 0.84 – 5.30 | 0.110   |
| p-trend                           |        |       |             | 0.273   |                 |             | 0.247   |
| <u>BMI &gt; 30</u>                |        |       |             |         |                 |             |         |
| Q1                                | 33     | 1     |             |         | 1               |             |         |
| Q2                                | 44     | 0.80  | 0.40 – 1.57 | 0.511   | 1.03            | 0.56 – 1.88 | 0.935   |
| Q3                                | 50     | 1.55  | 0.73 – 3.28 | 0.251   | 1.44            | 0.72 – 2.86 | 0.303   |
| Q4                                | 36     | 1.93  | 0.64 – 5.79 | 0.242   | 2.04            | 0.76 – 5.47 | 0.156   |
| p-trend                           |        |       |             | 0.274   |                 |             | 0.109   |

All models controlled for age and 5-year age category.

F2IP = Urine F2-isoprostane level, normalized to creatinine; HGPIN = high-grade prostatic intraepithelial neoplasia; WHR = waist-to-hip ratio; BMI = body-mass index.
